# Supplementary material
Source: PubMed Central journal article supplement (PMC4832027)
Supplement: npp2015332x1.pdf [file npp2015332x1.pdf]

## **A preliminary prospective study of an escalation in ‘maximum daily drinks’, fronto-parietal circuitry and impulsivity-related domains in young-adult drinkers**

Worhunsky PD, Dager AD, Meda, SA, Khadka S, Stevens MC, Austad CS, Raskin SA, Tennen H, Wood RM, Fallahi CR, Potenza MN, Pearlson GD.

### **Supplementary Material**

#### *Principal Component Analysis of Composite impulsivity-related domains (CIRD)*

Participants included in the PCA analysis (N=440) were 18.3 (SD=0.7) years of age and 59% were female. Approximately 80% reported some lifetime drinking, with an average 9.0 (SD=7.6) lifetime maximum number of drinks on a single occasion (ranging from 1 to 35). Participants were assessed with multiple self-report questionnaires; the Zuckerman Sensation Seeking Scales (ZSSS) (Zuckerman and Neeb, 1979), Behavioral Activation/Inhibition System (BAS/BIS) (Carver and White, 1994), Barratt Impulsiveness Scale (BIS-11) (Patton *et al*, 1995), sensitivity to reward and sensitivity to punishment (SPSRQ) (Torrubia *et al*, 2001), Padua Inventory (PI) (Sternberger and Burns, 1990) and computerized tasks comprising the (Classic Balloon Analog Risk Task (BART) (Hunt *et al*, 2005), JAVA Neuropsychological Test (JANET) version of the BART (Cherkil *et al*, 2012) and the Experiential Discounting Task (EDT) (Reynolds and Schiffbauer, 2004).

To assess the multidimensional impulsivity-related traits from these measures, factor analysis with principal components extraction method followed by varimax rotation was conducted using various sub-measures that included (i) thrill- and adventure- seeking (ZTAS), experience seeking (ZES), disinhibition (ZDIS) and boredom susceptibility (ZBS) sub-scales of ZSSS, (ii) drive, fun, reward sub-scales of BAS and BIS, (iii) attentional, motor and non-planning impulsivity sub-scales of BIS-11, (iv) sensitivity to reward and sensitivity to punishment sub-scales of SPSRQ (v) total score of Padua Inventory (PI), (vi) overall average adjusted pumps of the conventional BART, (vii) total pumps and total pops of the JANET BART and (viii) total area under the curve (AUC) from the EDT. Factor loadings  $\geq 0.5$  (Table S1) were chosen as cut-off for an impulsivity measure to load on its respective factors.

**Table S1.** Composite impulsivity-related domain (CIRD) factor structure

| <b>Variable/scale</b>              | <b>CIRD1</b><br>Impulsive<br>action | <b>CIRD2</b><br>Approach/<br>appetite<br>motivation | <b>CIRD3</b><br>Impulsivity/<br>compulsivity | <b>CIRD4</b><br>Experience<br>and thrill<br>seeking | <b>CIRD5</b><br>Risky<br>choice | <b>CIRD6</b><br>Impulsive<br>choice |
|------------------------------------|-------------------------------------|-----------------------------------------------------|----------------------------------------------|-----------------------------------------------------|---------------------------------|-------------------------------------|
| BIS-11 Non planning                | <b>0.82</b>                         | -0.03                                               | -0.01                                        | -0.01                                               | 0.01                            | -0.09                               |
| BIS-11 Attentional                 | <b>0.77</b>                         | 0.08                                                | 0.1                                          | -0.01                                               | -0.08                           | -0.13                               |
| BIS-11 Motor                       | <b>0.71</b>                         | 0.25                                                | 0.02                                         | 0.2                                                 | 0.1                             | -0.01                               |
| ZSSS Boredom                       | <b>0.54</b>                         | -0.05                                               | 0.02                                         | 0.32                                                | 0.03                            | 0.2                                 |
| ZSSS Disinhibition                 | <b>0.52</b>                         | 0.26                                                | -0.01                                        | 0.35                                                | 0.05                            | 0.2                                 |
| BAS Reward                         | -0.07                               | <b>0.86</b>                                         | 0.01                                         | -0.17                                               | -0.03                           | 0.007                               |
| BAS Drive                          | 0.2                                 | <b>0.72</b>                                         | 0.07                                         | 0.12                                                | 0.005                           | 0.03                                |
| BAS Fun                            | 0.4                                 | <b>0.58</b>                                         | -0.02                                        | 0.39                                                | 0.04                            | -0.05                               |
| SPSRQ Punishment                   | -0.03                               | -0.04                                               | <b>0.83</b>                                  | -0.2                                                | -0.09                           | -0.06                               |
| Padua Total score                  | 0.1                                 | -0.05                                               | <b>0.77</b>                                  | -0.09                                               | -0.01                           | -0.06                               |
| SPSRQ Reward                       | 0.05                                | 0.2                                                 | <b>0.73</b>                                  | 0.2                                                 | -0.006                          | 0.04                                |
| ZSSS Thrill- and adventure seeking | 0.01                                | 0.2                                                 | -0.02                                        | <b>0.74</b>                                         | 0.07                            | -0.15                               |
| ZSSS Experience seeking            | 0.29                                | 0.005                                               | 0.05                                         | <b>0.64</b>                                         | -0.03                           | 0.09                                |
| BIS                                | -0.1                                | 0.3                                                 | 0.24                                         | <b>-0.59</b>                                        | -0.08                           | -0.02                               |
| JANET BART Total pops              | 0.001                               | 0.05                                                | -0.03                                        | 0.04                                                | <b>0.85</b>                     | -0.009                              |
| JANET BART Total pumps             | 0.1                                 | 0.005                                               | -0.07                                        | -0.09                                               | <b>0.79</b>                     | -0.14                               |
| Classic BART Adjusted pumps        | -0.05                               | -0.07                                               | -0.003                                       | 0.15                                                | <b>0.51</b>                     | 0.23                                |
| EDT AUC                            | -0.03                               | 0.03                                                | -0.08                                        | -0.04                                               | 0.02                            | <b>0.9</b>                          |

Abbreviations: BIS-11, Baratt Impulsiveness Scale; ZSSS, Zuckerman Sensation Seeking Scales; BAS, Behavioral Activation System ; SPSRQ, Sensitivity to Reward and Sensitivity to Punishment Questionnaires; BIS, Behavioral Inhibition System; JANET: Java Neuropsychological Test; BART, Balloon Analog Risk Task; EDT, Experiential Discounting Task; AUC: area under the curve.

## References

- Carver CS, White TL (1994). Behavioral Inhibition, Behavioral Activation, and Affective Responses to Impending Reward and Punishment: The BIS/BAS Scales. *Journal of Personality and Social Psychology* **67**(2): 319-333.
- Cherkil S, Satish S, Mathew SS, Dinesh N, Kumar CT, Lombardo LE, *et al* (2012). Cross-cultural standardization of the South Texas Assessment of Neurocognition in India. *The Indian Journal of Medical Research* **136**(2): 280-288.
- Hunt MK, Hopko DR, Bare R, Lejuez CW, Robinson EV (2005). Construct validity of the Balloon Analog Risk Task (BART): associations with psychopathy and impulsivity. *Assessment* **12**(4): 416-428.
- Patton JH, Stanford MS, Barratt ES (1995). Factor structure of the Barratt impulsiveness scale. *Journal of Clinical Psychology* **51**(6): 768-774.
- Reynolds B, Schiffbauer R (2004). Measuring state changes in human delay discounting: an experiential discounting task. *Behavioural Processes* **67**(3): 343-356.
- Sternberger LG, Burns GL (1990). Obsessions and compulsions: psychometric properties of the Padua Inventory with an American college population. *Behaviour Research and Therapy* **28**(4): 341-345.
- Torrubia R, Avila C, Molto J, Caseras X (2001). The Sensitivity to Punishment and Sensitivity to Reward Questionnaire (SPSRQ) as a measure of Gray's anxiety and impulsivity dimensions. *Personality and Individual Differences* **31**: 837-862.
- Zuckerman M, Neeb M (1979). Sensation seeking and psychopathology. *Psychiatry Research* **1**(3): 255-264.
